# Supplementary material for: Discovery and exploration of new solid forms of dipeptide: l-alanyl-l-glutamine
Source: Royal Society of Chemistry journal article supplement (doi:10.1039/d3ce00957b), 2024-01-01
Supplement: d3ce00957b1.pdf [file d3ce00957b1.pdf]

## Supporting information

# Discovery and Exploration of New Solid Forms of Dipeptide: L-Alanyl-L-Glutamine

Jinqiu Fu <sup>a</sup>, Mengyang Cai <sup>a</sup>, Yuzhong Shi <sup>a</sup>, Yihang Hou <sup>a</sup>, Rongxi Guo <sup>a</sup>, Chiyi Wang <sup>a</sup>, Jingjing Zhao <sup>a</sup>, Wei Zhuang <sup>b</sup>, Hanjie Ying <sup>b</sup>, Pengpeng Yang <sup>b, \*</sup>, Keke Zhang <sup>a, \*</sup>

<sup>a</sup> Biology + Joint Research Center, School of Chemical Engineering and Technology, Zhengzhou University, Zhengzhou 450001, China.

<sup>b</sup> National Engineering Technique Research Center for Biotechnology, State Key Laboratory of Materials-Oriented Chemical Engineering, College of Biotechnology and Pharmaceutical Engineering, Nanjing Tech University, Nanjing 210009, China.

### Table of Contents

|           |                                                                                                                                                                                      |
|-----------|--------------------------------------------------------------------------------------------------------------------------------------------------------------------------------------|
| Figure S1 | Powder X-ray Diffraction of different Ala-Gln solid forms.                                                                                                                           |
| Figure S2 | Raman spectroscopy analysis of different Ala-Gln solid forms.                                                                                                                        |
| Figure S3 | Microscopy images of Ala-Gln form (a) II, (b) III, (c) IV, (d) 2H, (e) S <sub>EtOH</sub> and (f) S <sub>DMSO</sub>                                                                   |
| Figure S4 | The crystal structure of Ala-Gln crystals form (a) II, (b) III, (c) IV, (d) 2H, (e) S <sub>EtOH</sub> and (f) S <sub>DMSO</sub> .                                                    |
| Figure S5 | 2D fingerprint plots of different Ala-Gln solid forms.                                                                                                                               |
| Figure S6 | Voids of Ala-Gln crystals form III and IV.                                                                                                                                           |
| Figure S7 | Microscopy images of Ala-Gln solvates before ((a) 2H, (b) S <sub>EtOH</sub> and (c) S <sub>DMSO</sub> ) and after heating ((d)2H, (e) S <sub>EtOH</sub> and (f) S <sub>DMSO</sub> ). |
| Table S1  | Torsion angles of different Ala-Gln solid forms.                                                                                                                                     |
| Table S2  | Hydrogen bonds with $H \cdots A < r(A) + 2.000 \text{ \AA}$ and $\langle DHA \rangle > 110^\circ$ of different Ala-Gln solid forms.                                                  |
| Figure S8 | Powder X-ray Diffraction of primary exploring experiments.                                                                                                                           |

## Supporting information

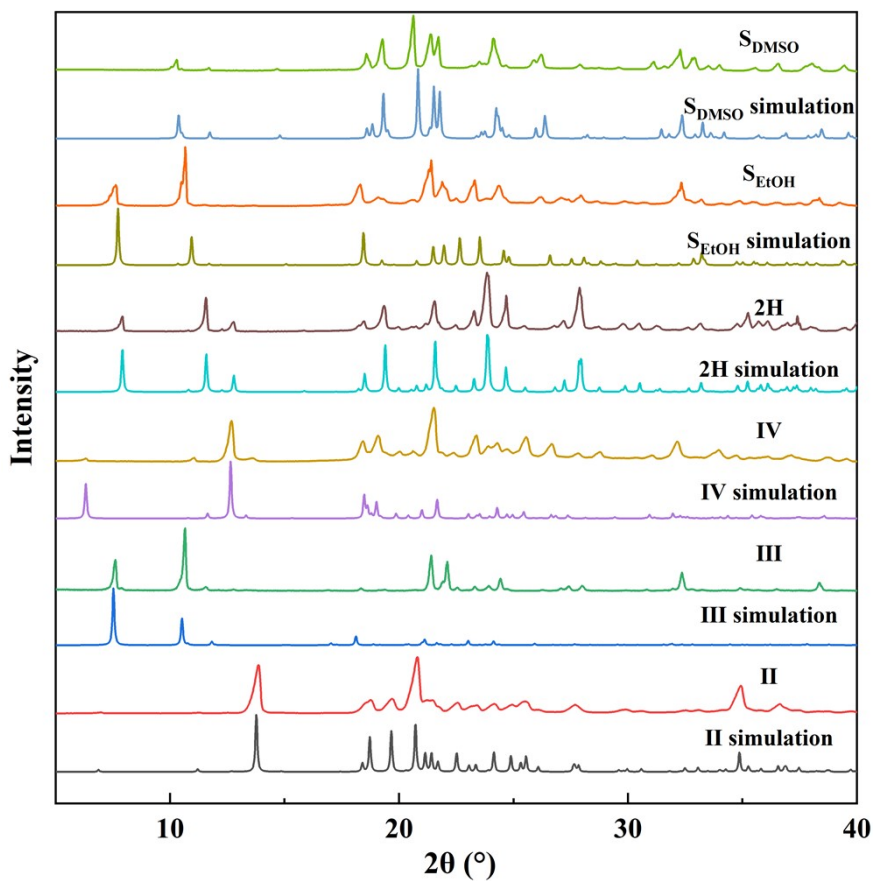

**Figure S1.** Powder X-ray Diffraction of different Ala-Gln solid forms.

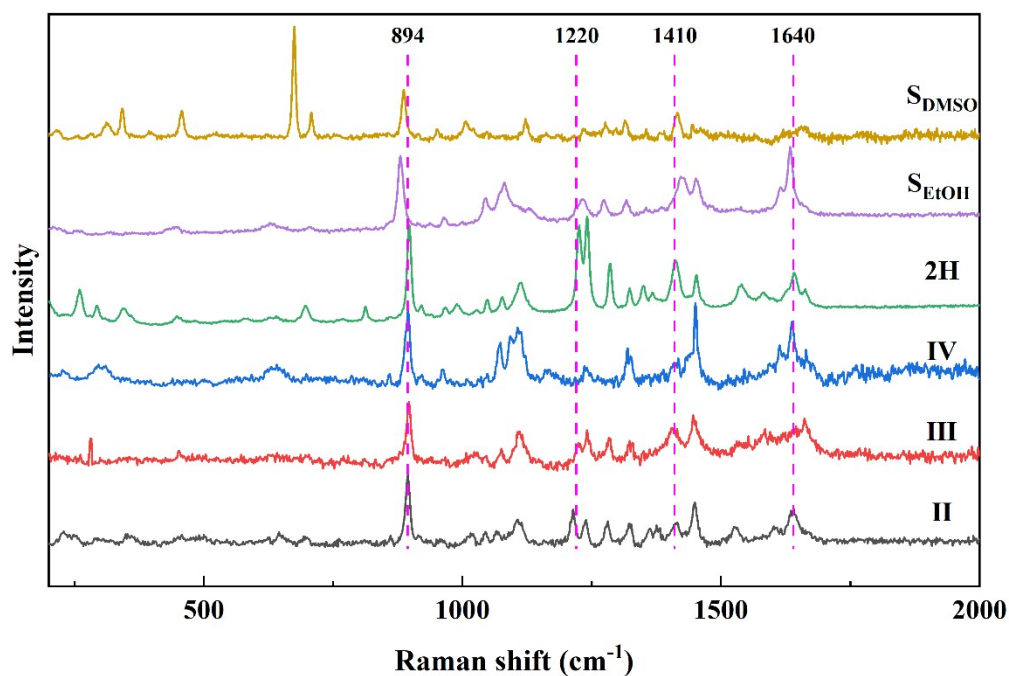

**Figure S2.** Raman spectroscopy analysis of different Ala-Gln solid forms.

## Supporting information

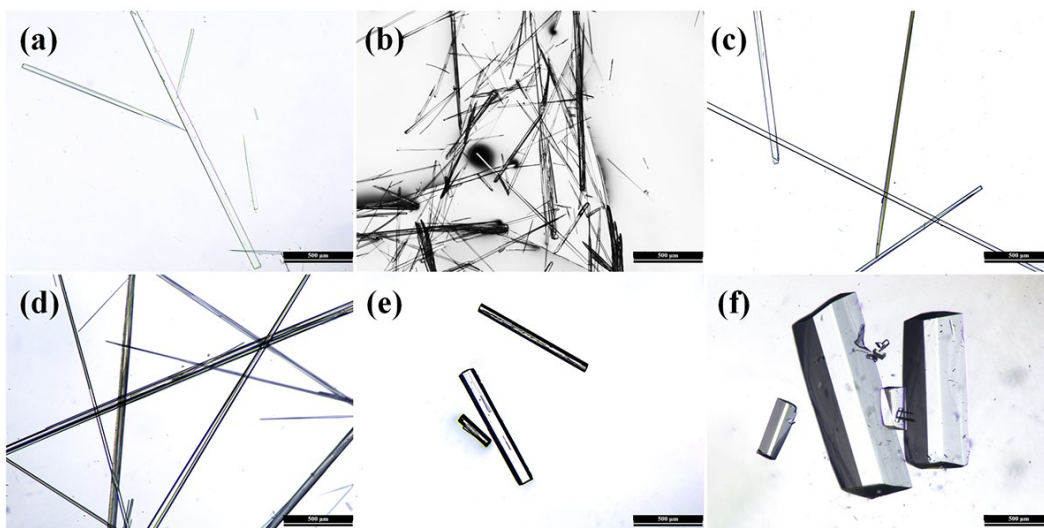

**Figure S3.** Microscopy images of Ala-Gln form (a) II, (b) III, (c) IV, (d) 2H, (e)  $S_{EtOH}$  and (f)  $S_{DMSO}$ .

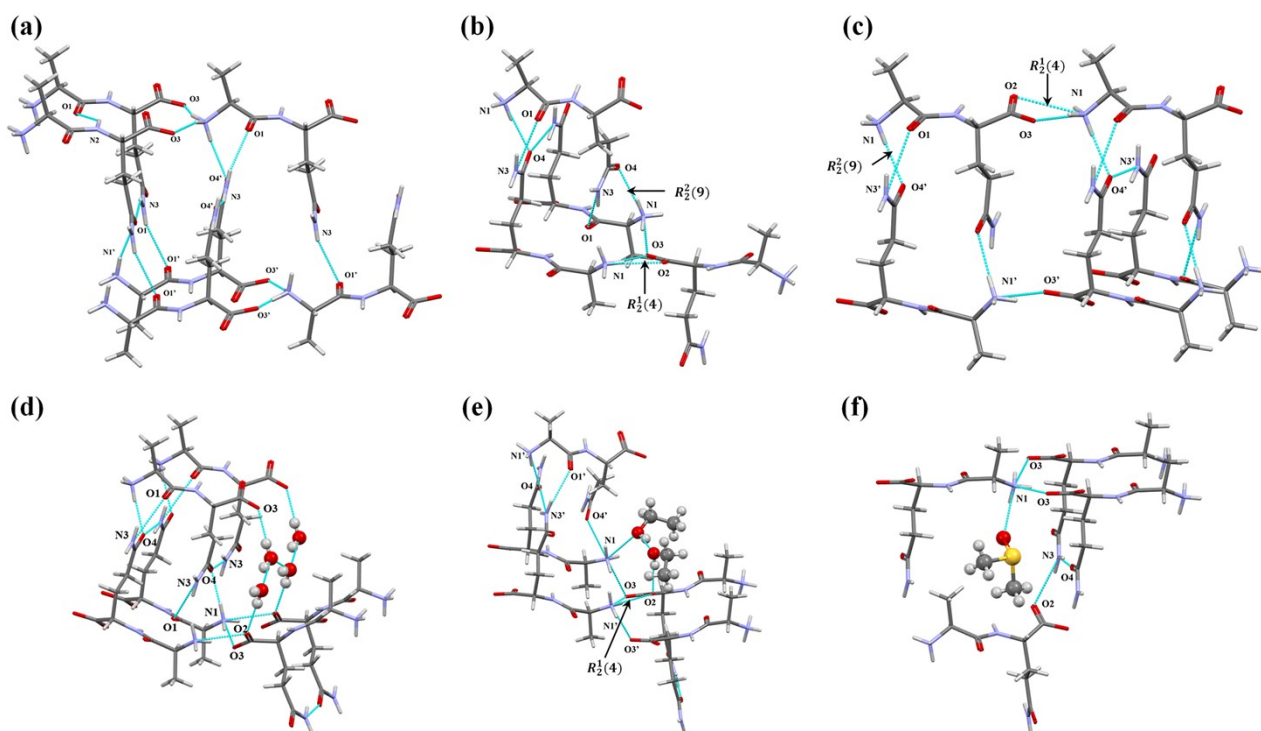

**Figure S4.** The crystal structure of Ala-Gln crystals form (a) II, (b) III, (c) IV, (d) 2H, (e)  $S_{EtOH}$  and (f)  $S_{DMSO}$ . The blue dot lines are intermolecular hydrogen bonding between molecules.

## Supporting information

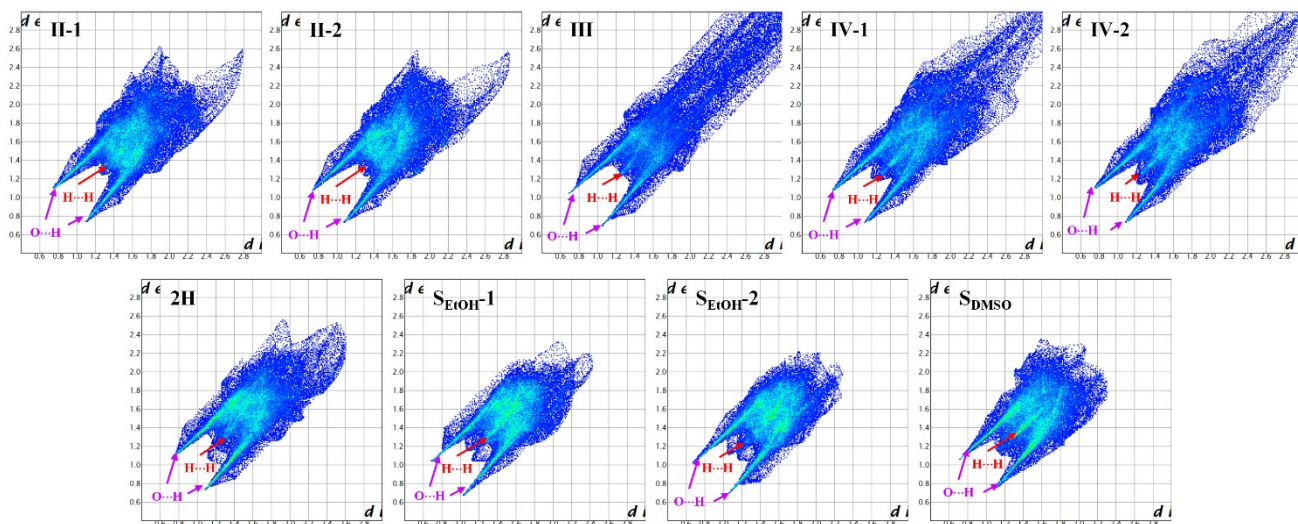

**Figure S5.** 2D fingerprint plots of different Ala-Gln solid forms.

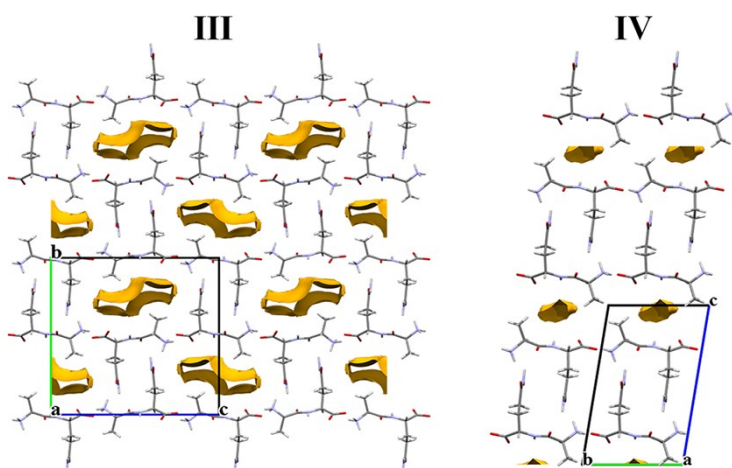

**Figure S6.** Voids of Ala-Gln crystals form III and IV.

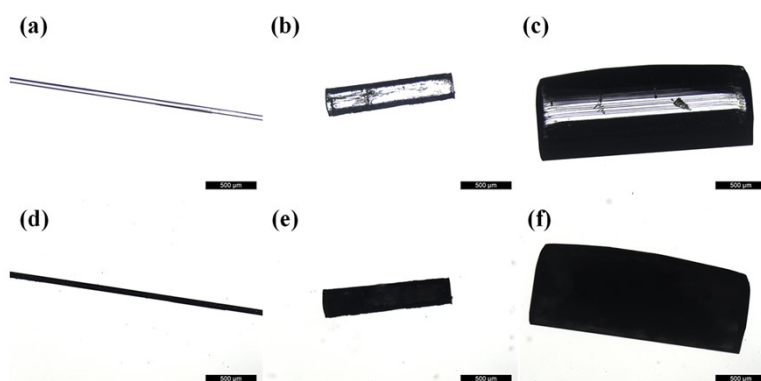

**Figure S7.** Microscopy images of Ala-Gln solvates before ((a) 2H, (b)  $S_{EtOH}$  and (c)  $S_{DMSO}$ ) and after heating ((d) 2H, (e)  $S_{EtOH}$  and (f)  $S_{DMSO}$ ).

## Supporting information

**Table S1.** Torsion angles of different Ala-Gln solid forms.

| Torsion              | C5-C4-C6-C7 | C6-C7-C8-N3 | C6-C7-C8-O4 | N2-C4-C6-C7 |
|----------------------|-------------|-------------|-------------|-------------|
| II-1                 | -56.94      | 8.36        | -174.36     | 61.27       |
| II-2                 | -56.37      | -169.33     | 7.53        | 63.95       |
| III                  | -55.84      | 3.78        | -177.44     | 65.91       |
| IV-1                 | -58.38      | 174.28      | -5.43       | 62.23       |
| IV-2                 | -57.68      | 1.50        | -177.79     | 63.51       |
| 2H                   | -56.04      | 1.84        | -179.40     | 66.28       |
| S <sub>EtOH</sub> -1 | -53.51      | 169.95      | -9.50       | 68.11       |
| S <sub>EtOH</sub> -2 | -53.54      | -178.23     | 2.29        | 67.44       |
| S <sub>DMSO</sub>    | -57.63      | -179.69     | -0.58       | 65.42       |

**Table S2.** Hydrogen bonds with  $H\cdots A < r(A) + 2.000 \text{ \AA}$  and  $\langle DHA \rangle > 110^\circ$  of different Ala-Gln solid forms.

| Form                      | D-H                       | d (D-H) | d (H $\cdots$ A) | $\langle DHA \rangle$ | d (D $\cdots$ A) |
|---------------------------|---------------------------|---------|------------------|-----------------------|------------------|
| II                        | N1-H1A $\cdots$ O3        | 0.89    | 1.93             | 149.5                 | 2.735            |
|                           | N1'-H1'C $\cdots$ O4      | 0.89    | 1.99             | 169.2                 | 2.864            |
|                           | N1'-H1'A $\cdots$ O3      | 0.89    | 2.04             | 139.6                 | 2.776            |
|                           | N1-H1C $\cdots$ O4'A      | 0.89    | 1.87             | 168.4                 | 2.75             |
|                           | N3A_b-H3AB_b $\cdots$ O4A | 0.86    | 2.12             | 134.2                 | 2.79             |
|                           | N1'-H1'C $\cdots$ O4A     | 0.89    | 1.89             | 167.0                 | 2.76             |
|                           | N1-H1B $\cdots$ O3        | 0.89    | 2.01             | 163.0                 | 2.876            |
|                           | N1-H1C $\cdots$ O4        | 0.89    | 2.04             | 171.5                 | 2.92             |
|                           | N1-H1C $\cdots$ N3'A      | 0.89    | 2.91             | 124.7                 | 3.49             |
|                           | N2-H2 $\cdots$ O1         | 0.86    | 2.71             | 145.7                 | 3.452            |
|                           | N3_a-H3B_a $\cdots$ O4    | 0.86    | 2.15             | 133.2                 | 2.813            |
|                           | N3_a-H3A_a $\cdots$ O1'   | 0.86    | 2.32             | 152.9                 | 3.114            |
|                           | N3A_b-H3AA_b $\cdots$ O3' | 0.86    | 2.32             | 170                   | 3.17             |
|                           | N1'-H1'B $\cdots$ O3'     | 0.89    | 1.97             | 160.5                 | 2.825            |
|                           | N2'-H2' $\cdots$ O1'      | 0.88    | 2.72             | 138                   | 3.432            |
|                           | N3'_a-H3'A_a $\cdots$ O1  | 0.86    | 2.11             | 164.2                 | 2.952            |
| N3'_a-H3'B_a $\cdots$ O4' | 0.86                      | 2.09    | 147.7            | 2.85                  |                  |
| III                       | N1-H1A $\cdots$ O4        | 0.91    | 1.957            | 171.06                | 2.859            |
|                           | N1-H1B $\cdots$ O3        | 0.91    | 2.249            | 138.57                | 2.993            |
|                           | N1-H1B $\cdots$ O2        | 0.91    | 2.015            | 159.19                | 2.883            |
|                           | N1-H1C $\cdots$ O3        | 0.91    | 1.829            | 167.96                | 2.726            |
|                           | N2-H2 $\cdots$ O1         | 0.899   | 2.51             | 138.47                | 3.239            |

## Supporting information

| Form              | D-H            | d (D-H) | d (H...A) | < DHA  | d (D...A) |
|-------------------|----------------|---------|-----------|--------|-----------|
|                   | N3-H3A...O1    | 0.88    | 2.128     | 152.71 | 2.938     |
|                   | N3-H3B...O4    | 0.88    | 2.059     | 144.77 | 2.824     |
|                   | C4-H4...O2     | 1       | 2.35      | 169.89 | 3.339     |
|                   | C2-H2...O3     | 1       | 2.635     | 111.11 | 3.137     |
|                   | C2-H2...O1     | 1       | 2.506     | 156.63 | 3.447     |
| IV                | N1-H1A...O4'   | 0.89    | 1.954     | 174.44 | 2.841     |
|                   | N1-H1B...O3    | 0.89    | 1.994     | 170.09 | 2.874     |
|                   | N1-H1B...O2    | 0.89    | 2.502     | 118.62 | 3.031     |
|                   | N1-H1C...O3    | 0.89    | 1.929     | 149.5  | 2.734     |
|                   | N1'-H1A'...O4  | 0.89    | 2.002     | 176.66 | 2.891     |
|                   | N1'-H1B'...O3' | 0.89    | 1.997     | 169.13 | 2.876     |
|                   | N1'-H1B'...O2' | 0.89    | 2.557     | 113.12 | 3.02      |
|                   | N1'-H1C'...O3' | 0.89    | 1.983     | 144.2  | 2.754     |
|                   | N2-H2...O2     | 0.902   | 2.141     | 111.2  | 2.607     |
|                   | N3-H3A...O1'   | 0.86    | 2.175     | 150.32 | 2.953     |
|                   | N3-H3B...O4    | 0.86    | 2.083     | 145.81 | 2.836     |
|                   | N3'-H3A'...O1  | 0.86    | 2.204     | 154.58 | 3.003     |
|                   | N3'-H3B'...O4' | 0.86    | 2.135     | 134.11 | 2.802     |
|                   | C4-H4...O2     | 0.98    | 2.345     | 157.77 | 3.273     |
|                   | C4'-H4'...O2'  | 0.98    | 2.34      | 159.44 | 3.276     |
|                   | C6-H6...O1     | 0.97    | 2.652     | 115.83 | 3.196     |
|                   | C6'-H6'...O1'  | 0.97    | 2.63      | 116.52 | 3.183     |
| C2-H2...O1        | 0.98           | 2.378   | 158.85    | 3.311  |           |
| C2'-H2'...O1'     | 0.98           | 2.411   | 155.88    | 3.33   |           |
| 2H                | N1-H1A...O2    | 0.89    | 2.033     | 146.33 | 2.818     |
|                   | N1-H1A...O3    | 0.89    | 2.324     | 152.44 | 3.14      |
|                   | N1-H1B...O3    | 0.89    | 1.947     | 166.05 | 2.819     |
|                   | N1-H1C...O4    | 0.89    | 1.952     | 175.09 | 2.839     |
|                   | N2-H2...O1     | 0.888   | 2.465     | 147.15 | 3.246     |
|                   | N3-H3A...O1    | 0.86    | 2.196     | 151.93 | 2.983     |
|                   | N3-H3B...O4    | 0.86    | 2.053     | 144.62 | 2.799     |
|                   | C1-H1F...O5    | 0.96    | 2.65      | 156.69 | 3.552     |
|                   | C2-H2A...O1    | 0.98    | 2.515     | 155.73 | 3.432     |
|                   | C4-H4...O2     | 0.98    | 2.38      | 170.07 | 3.349     |
| S <sub>EtOH</sub> | N1-H1A...O2'   | 0.91    | 1.81      | 171.89 | 2.714     |
|                   | N1'-H1A'...O3  | 0.91    | 2.176     | 145.93 | 2.974     |
|                   | N1-H1A...O3'   | 0.91    | 2.606     | 130.77 | 3.274     |
|                   | N1-H1B...O2    | 0.91    | 1.919     | 160.91 | 2.794     |
|                   | N1-H1C...O4'   | 0.91    | 2.112     | 149.17 | 2.931     |
|                   | N1-H1C...O5    | 0.91    | 2.427     | 119.21 | 2.979     |
|                   | N2'-H2'...O1   | 0.889   | 2.495     | 148.89 | 3.289     |
|                   | N2-H2...O1'    | 0.895   | 2.349     | 156.76 | 3.191     |
|                   | N3'-H3A'...O1' | 0.88    | 2.27      | 150.99 | 3.07      |

## Supporting information

| Form              | D-H            | d (D-H) | d (H...A) | < DHA  | d (D...A) |
|-------------------|----------------|---------|-----------|--------|-----------|
|                   | N3-H3A...O1    | 0.88    | 2.179     | 148.59 | 2.966     |
|                   | N3'-H3A'...O2  | 0.91    | 2.069     | 149.9  | 2.892     |
|                   | N3'-H3B'...O3' | 0.91    | 1.823     | 165.13 | 2.713     |
|                   | N3'-H3B'...O4  | 0.88    | 2.104     | 133.98 | 2.788     |
|                   | N3-H3B...O4'   | 0.88    | 2.143     | 134.92 | 2.833     |
|                   | N3'-H3C'...O4  | 0.91    | 1.916     | 169.5  | 2.816     |
|                   | C2'-H2'...O1   | 1       | 2.501     | 155.87 | 3.438     |
|                   | C2-H2...O1'    | 1       | 2.534     | 152.9  | 3.454     |
|                   | C2-H2...O3'    | 1       | 2.64      | 113.63 | 3.176     |
|                   | C4'-H4'...O2   | 1       | 2.387     | 173.72 | 3.383     |
|                   | C4-H4...O2'    | 1       | 2.383     | 166.37 | 3.364     |
|                   | O5'-H10C...O2  | 0.84    | 1.916     | 169.34 | 2.745     |
|                   | O5-H5...O5'    | 0.84    | 1.96      | 158.96 | 2.761     |
|                   | N1-H1A...O5    | 0.91    | 1.9       | 161.75 | 2.779     |
|                   | N1-H1B...O3    | 0.91    | 1.984     | 154.54 | 2.833     |
|                   | N1-H1B...O2    | 0.91    | 2.641     | 112.02 | 3.099     |
|                   | N1-H1C...O3    | 0.91    | 1.995     | 144.76 | 2.788     |
|                   | N1-H1A...S1    | 0.91    | 2.946     | 135.24 | 3.649     |
|                   | N2-H2...O1     | 0.88    | 2.499     | 149.85 | 3.29      |
|                   | N3-H3A...O2    | 0.88    | 2.15      | 157.55 | 2.983     |
| S <sub>DMSO</sub> | N3-H3B...O4    | 0.88    | 1.946     | 169.54 | 2.816     |
|                   | C1-H1A...O4    | 0.98    | 2.633     | 130.22 | 3.35      |
|                   | C2-H2...O1     | 1       | 2.189     | 157.99 | 3.138     |
|                   | C4-H4...O2     | 1       | 2.352     | 151.24 | 3.264     |
|                   | C9-H9A...O1    | 0.98    | 2.558     | 153.34 | 3.462     |
|                   | C9-H10B...O5   | 0.98    | 2.422     | 129.77 | 3.14      |
|                   | C10-H10A...O4  | 0.98    | 2.537     | 126.56 | 3.219     |

### Crystal exploring experiments

Firstly, 4 g Al-Gln of form II was dissolved in 20 g water. After fully dissolved, the clarified solution was filtered through a 0.45 $\mu$ m filter. Secondly, 1 mL of 0.1 g/g Al-Gln aqueous solution was placed in 10 mL sample bottles and 0.056 mol organic solvents were added in. Organic solvents were methanol, ethanol, isopropanol, n-propanol, DMSO, tetrahydrofuran, acetonitrile, DMF, dioxane. Finally, after crystal for a week at the temperature of 298 K, the crystal in sample bottles were filtered.

The sample battles which added tetrahydrofuran, acetonitrile had no crystals. The crystals were direct measured without grinding and the PXRD results was shown as Figure S8. The results showed the crystals crystallized in isopropanol and DMF were form II, and the crystals in dioxane were form

## Supporting information

III. The crystals in n-propanol were form 2H, and the crystals in DMSO were solvate form  $S_{\text{DMSO}}$ . The crystals crystallized in methanol were a mixture of form II and IV, and crystals in ethanol were form  $S_{\text{EtOH}}$ .

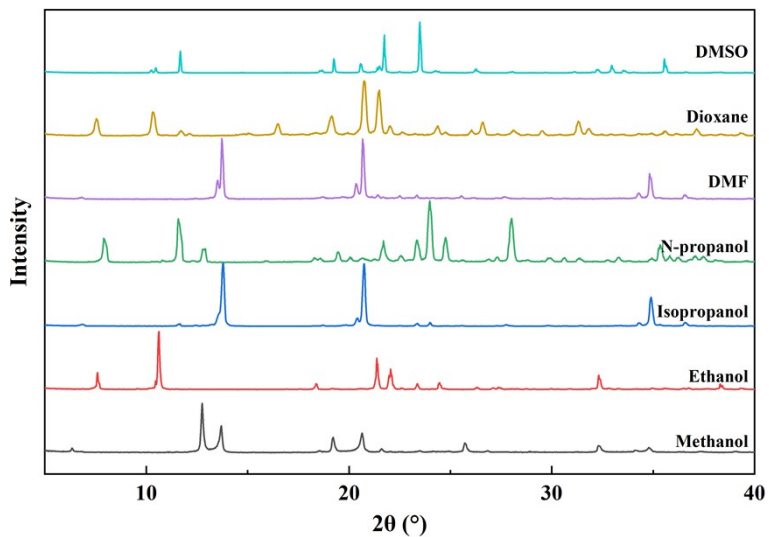

Figure S8. Powder X-ray Diffraction of crystal exploring experiments.
